# Supplementary material
Source: HighWire-hosted journal article supplement (https://erj.ersjournals.com/content/55/4/1901495)
Supplement: inline-supplementary-material-2 [file inline-supplementary-material-2.pdf]

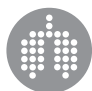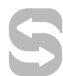

SHAREABLE PDF

# Acute air pollution exposure alters neutrophils in never-smokers and at-risk humans

Denise J. Wooding<sup>1</sup>, Min Hyung Ryu<sup>1</sup>, Hang Li<sup>1,2</sup>, Neil E. Alexis<sup>3</sup>, Olga Pena<sup>1</sup> and Chris Carlsten<sup>1</sup>, Canadian Respiratory Research Network

**Affiliations:** <sup>1</sup>Air Pollution Exposure Laboratory, Dept of Medicine, Division of Respiratory Medicine, The University of British Columbia, Vancouver, BC, Canada. <sup>2</sup>Dept of Otolaryngology, The First Affiliated Hospital of Sun Yat-sen University, Guangzhou, P.R. China. <sup>3</sup>UNC Center for Environmental Medicine Asthma and Lung Biology, UNC Chapel Hill, Chapel Hill, NC, USA.

**Correspondence:** Chris Carlsten, 2775 Laurel St, 7th Floor, the Lung Center, Vancouver General Hospital – Gordon and Leslie Diamond Health Care Centre, Vancouver, BC V5Z 1M9, Canada. E-mail: carlsten@mail.ubc.ca

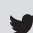

@ERSpublications

Acute human exposure to traffic-related air pollution leads lower airway neutrophils to release neutrophil extracellular traps, linked to COPD severity and airflow limitation. Ex-smokers and COPD patients mount a greater neutrophil response to exposure. <http://bit.ly/2DEsYzE>

**Cite this article as:** Wooding DJ, Ryu MH, Li H, *et al.* Acute air pollution exposure alters neutrophils in never-smokers and at-risk humans. *Eur Respir J* 2020; 55: 1901495 [<https://doi.org/10.1183/13993003.01495-2019>].

This single-page version can be shared freely online.

**ABSTRACT** Outdoor air pollution exposure increases chronic obstructive pulmonary disease (COPD) hospitalisations, and may contribute to COPD development. The mechanisms of harm, and the extent to which at-risk populations are more susceptible are not fully understood. Neutrophils are recruited to the lung following diesel exhaust exposure, a model of traffic-related air pollution (TRAP), but their functional role in this response is unknown. The purpose of this controlled human-exposure crossover study was to assess the effects of acute diesel exhaust exposure on neutrophil function in never-smokers and at-risk populations, with support from additional *in vitro* studies.

18 participants, including never-smokers (n=7), ex-smokers (n=4) and mild-moderate COPD patients (n=7), were exposed to diesel exhaust and filtered air for 2 h on separate occasions, and neutrophil function in blood (0 h and 24 h post-exposure) and bronchoalveolar lavage (24 h post-exposure) was assessed.

Compared to filtered air, diesel exhaust exposure reduced the proportion of circulating band cells at 0 h, which was exaggerated in COPD patients. Diesel exhaust exposure increased the amount of neutrophil extracellular traps (NETs) in the lung across participants. COPD patients had increased peripheral neutrophil activation following diesel exhaust exposure. *In vitro*, suspended diesel exhaust particles increased the amount of NETs measured in isolated neutrophils. We propose NET formation as a possible mechanism through which TRAP exposure affects airway pathophysiology. In addition, COPD patients may be more prone to an activated inflammatory state following exposure.

This is the first controlled human TRAP exposure study directly comparing at-risk phenotypes (COPD and ex-smokers) with lower-risk (never-smokers) participants, elucidating the human susceptibility spectrum.
